# Supplementary material
Source: PubMed Central journal article supplement (PMC6210113)
Supplement: zam022188835s1.pdf [file zam022188835s1.pdf]

## SUPPLEMENTAL MATERIAL

**Transcriptional studies on *Streptomyces clavuligerus oppA2*-deleted mutant: N-acetylglycyl-clavaminic acid is an extracellular intermediate of clavulanic acid biosynthesis (AEM01301-17)**

R. Álvarez-Álvarez<sup>1</sup>, A. Rodríguez-García<sup>2</sup>, Y. Martínez-Burgo<sup>1</sup>, J.F. Martín<sup>1</sup>  
and P. Liras P<sup>1</sup>.

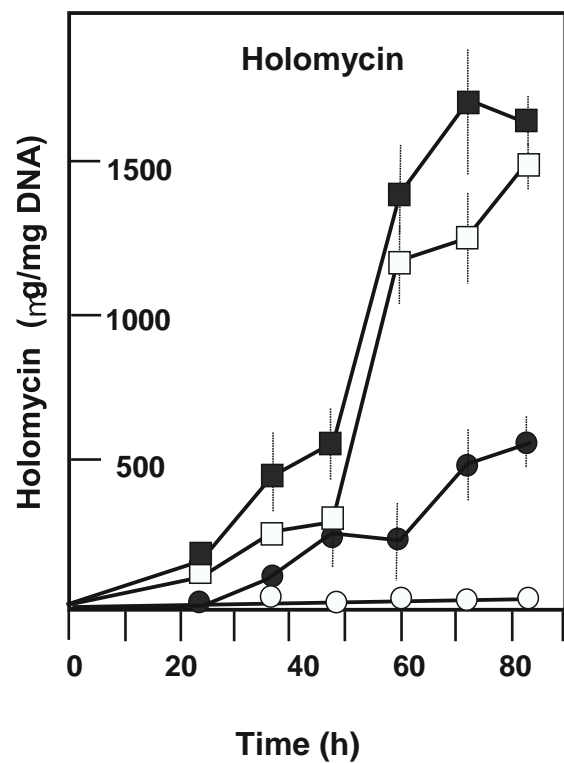

Fig. S1. Holomycin production by the strains used in this work.

The strains used are *S. clavuligerus* ATCC 27064 (white circles), *S. clavuligerus*  $\Delta oppA2$  pSCL<sup>+</sup> (black circles), *S. clavuligerus* pSCL4<sup>-</sup> (white squares), *S. clavuligerus*  $\Delta oppA2$  pSCL4<sup>-</sup> (black squares).

**Supplementary Table 1. Genes differentially transcribed between *S. clavuligerus*  $\Delta$ oppA2::aac and *S. clavuligerus* ATCC 27064 using a filter of BHcorrected p-value<0.05 and values of  $M_c > 2$  or  $M_c < -2$ , for at least one of the sampling times. The genes shown in Table 1 are not included in this Table.**

| Gene                                   | Product                                                     | $M_c$  |        |       | BH-corrected p value |                      |                      | Fold change |        |      |
|----------------------------------------|-------------------------------------------------------------|--------|--------|-------|----------------------|----------------------|----------------------|-------------|--------|------|
|                                        |                                                             | 22.5 h | 46.5 h | 60 h  | 22.5 h               | 46.5 h               | 60 h                 | 22.5 h      | 46.5 h | 60 h |
| <b>Regulators</b>                      |                                                             |        |        |       |                      |                      |                      |             |        |      |
| SCLAV_1409                             | Regulatory protein                                          | -0.77  | -2.34  | 0.06  | 5.88E <sup>-01</sup> | 7.42E <sup>-03</sup> | 9.74E <sup>-01</sup> | 1.70        | 5.05   | 1.04 |
| SCLAV_1660                             | RNA polymerase ECF-subfamily sigma factor                   | 1.30   | 2.13   | 2.96  | 2.34E <sup>-02</sup> | 3.39E <sup>-04</sup> | 4.86E <sup>-06</sup> | 2.47        | 4.37   | 7.76 |
| SCLAV_2428                             | Regulator                                                   | -2.17  | -1.92  | -2.46 | 1.23E <sup>-02</sup> | 1.84E <sup>-02</sup> | 5.67E <sup>-03</sup> | 4.49        | 3.80   | 5.51 |
| SCLAV_2712                             | Regulatory protein                                          | 0.87   | 2.11   | 0.99  | 3.37E <sup>-01</sup> | 3.27E <sup>-03</sup> | 2.01E <sup>-01</sup> | 1.83        | 4.32   | 1.99 |
| SCLAV_3047                             | Predicted transcriptional regulator                         | -2.35  | -1.81  | -0.74 | 3.67E <sup>-03</sup> | 1.96E <sup>-02</sup> | 4.76E <sup>-01</sup> | 5.08        | 3.51   | 1.67 |
| SCLAV_3269                             | Putative two-component system response regulator            | 0.43   | 2.17   | 0.39  | 7.96E <sup>-01</sup> | 7.10E <sup>-03</sup> | 7.72E <sup>-01</sup> | 1.35        | 4.51   | 1.31 |
| SCLAV_3358                             | Response regulator                                          | 2.49   | -0.04  | 0.32  | 1.76E <sup>-02</sup> | 9.82E <sup>-01</sup> | 8.70E <sup>-01</sup> | 5.64        | 1.03   | 1.25 |
| SCLAV_5223                             | Regulatory protein                                          | -1.21  | -2.12  | -1.21 | 7.48E <sup>-02</sup> | 1.37E <sup>-03</sup> | 5.62E <sup>-02</sup> | 2.31        | 4.33   | 2.31 |
| SCLAV_p0788                            | Pleiotropic regulatory protein DegT                         | -2.23  | -3.16  | -0.91 | 1.31E <sup>-01</sup> | 1.28E <sup>-02</sup> | 6.38E <sup>-01</sup> | 4.68        | 8.91   | 1.88 |
| SCLAV_p0948                            | AraC family transcription regulator                         | 2.23   | 0.30   | 0.17  | 1.58E <sup>-04</sup> | 6.34E <sup>-01</sup> | 8.74E <sup>-01</sup> | 4.70        | 1.23   | 1.12 |
| <b>Proteins with diverse functions</b> |                                                             |        |        |       |                      |                      |                      |             |        |      |
| SCLAV_0038                             | Phage tail region protein                                   | -0.40  | -2.12  | -1.42 | 8.39E <sup>-01</sup> | 1.29E <sup>-02</sup> | 1.31E <sup>-01</sup> | 1.32        | 4.36   | 2.67 |
| SCLAV_0075                             | Chitinase                                                   | 2.80   | 0.38   | 0.20  | 1.50E <sup>-03</sup> | 7.28E <sup>-01</sup> | 9.12E <sup>-01</sup> | 6.97        | 1.30   | 1.15 |
| SCLAV_0194                             | Hydroxylase                                                 | 0.44   | 2.31   | 0.47  | 8.39E <sup>-01</sup> | 1.26E <sup>-02</sup> | 7.70E <sup>-01</sup> | 1.35        | 4.96   | 1.39 |
| SCLAV_0208                             | 2- $\alpha$ -KG-dependent ethylene/succinate-forming enzyme | 0.32   | 2.28   | -0.20 | 8.81E <sup>-01</sup> | 9.41E <sup>-03</sup> | 9.14E <sup>-01</sup> | 1.25        | 4.85   | 1.15 |
| SCLAV_0235                             | Lipoprotein                                                 | 2.14   | 1.31   | 0.35  | 3.00E <sup>-04</sup> | 1.55E <sup>-02</sup> | 6.82E <sup>-01</sup> | 4.41        | 2.48   | 1.28 |
| SCLAV_0335                             | Thioredoxin-like protein                                    | 0.46   | 2.02   | 0.37  | 8.23E <sup>-01</sup> | 2.83E <sup>-02</sup> | 8.33E <sup>-01</sup> | 1.38        | 4.05   | 1.29 |
| SCLAV_0345                             | Hydrogenase accessory protein                               | 0.62   | 2.15   | -0.32 | 6.43E <sup>-01</sup> | 5.08E <sup>-03</sup> | 8.14E <sup>-01</sup> | 1.53        | 4.43   | 1.25 |
| SCLAV_0422                             | NADH:flavin oxidoreductase                                  | 1.33   | 2.07   | 0.68  | 2.80E <sup>-01</sup> | 2.80E <sup>-02</sup> | 6.38E <sup>-01</sup> | 2.52        | 4.20   | 1.61 |
| SCLAV_0424                             | Putative NADPH:quinone reductase                            | 0.42   | 2.10   | -0.02 | 8.38E <sup>-01</sup> | 1.78E <sup>-02</sup> | 9.94E <sup>-01</sup> | 1.34        | 4.29   | 1.01 |

|            |                                                                   |       |       |       |                      |                      |                      |      |       |      |
|------------|-------------------------------------------------------------------|-------|-------|-------|----------------------|----------------------|----------------------|------|-------|------|
| SCLAV_0529 | NLP/P60-family protein                                            | 1.12  | -0.02 | 3.25  | 1.53E <sup>-01</sup> | 9.82E <sup>-01</sup> | 2.52E <sup>-05</sup> | 2.17 | 1.02  | 9.48 |
| SCLAV_0822 | rRNA methyltransferase                                            | 0.42  | 2.18  | 0.97  | 8.16E <sup>-01</sup> | 9.17E <sup>-03</sup> | 3.33E <sup>-01</sup> | 1.34 | 4.54  | 1.95 |
| SCLAV_0909 | Gluconokinase                                                     | 0.79  | 2.22  | 0.46  | 6.91E <sup>-01</sup> | 3.12E <sup>-02</sup> | 8.08E <sup>-01</sup> | 1.72 | 4.67  | 1.38 |
| SCLAV_0939 | Integral membrane protein                                         | 2.13  | 0.60  | 0.72  | 4.42E <sup>-02</sup> | 6.00E <sup>-01</sup> | 6.18E <sup>-01</sup> | 4.39 | 1.52  | 1.65 |
| SCLAV_1012 | DUF320 domain-containing protein                                  | -1.61 | -3.29 | -0.75 | 3.26E <sup>-01</sup> | 9.21E <sup>-03</sup> | 7.40E <sup>-01</sup> | 3.05 | 9.75  | 1.69 |
| SCLAV_1032 | Transglycosylase associated protein                               | 0.79  | 2.11  | 1.36  | 6.80E <sup>-01</sup> | 3.50E <sup>-02</sup> | 2.55E <sup>-01</sup> | 1.72 | 4.32  | 2.56 |
| SCLAV_1431 | Glutamine synthetase 2                                            | 0.91  | 3.44  | 0.42  | 7.33E <sup>-01</sup> | 1.07E <sup>-02</sup> | 8.74E <sup>-01</sup> | 1.88 | 10.84 | 1.34 |
| SCLAV_1561 | Integral membrane protein                                         | 0.23  | 2.40  | 0.51  | 9.40E <sup>-01</sup> | 2.21E <sup>-02</sup> | 7.85E <sup>-01</sup> | 1.17 | 5.29  | 1.43 |
| SCLAV_1871 | Cof-like hydrolase                                                | 0.66  | 2.73  | 0.42  | 7.54E <sup>-01</sup> | 9.63E <sup>-03</sup> | 8.30E <sup>-01</sup> | 1.58 | 6.63  | 1.34 |
| SCLAV_1916 | Ricin B lectin                                                    | 0.02  | -1.70 | -2.33 | 9.94E <sup>-01</sup> | 7.21E <sup>-02</sup> | 2.18E <sup>-02</sup> | 1.02 | 3.26  | 5.01 |
| SCLAV_2123 | Nucleotide phosphorylase                                          | 0.00  | 2.26  | -0.33 | 1.00E+00             | 3.32E <sup>-02</sup> | 8.77E <sup>-01</sup> | 1.00 | 4.80  | 1.26 |
| SCLAV_2337 | Estradiol dioxygenase class III protein subunit B                 | 0.81  | 2.03  | 0.45  | 3.96E <sup>-01</sup> | 4.47E <sup>-03</sup> | 6.82E <sup>-01</sup> | 1.76 | 4.08  | 1.36 |
| SCLAV_2577 | Putative phage integrase                                          | 0.54  | 2.16  | 0.21  | 6.91E <sup>-01</sup> | 4.03E <sup>-03</sup> | 8.86E <sup>-01</sup> | 1.45 | 4.47  | 1.16 |
| SCLAV_2964 | Putative acyl-CoA dehydrogenase                                   | -0.07 | -0.61 | -2.66 | 9.83E <sup>-01</sup> | 6.33E <sup>-01</sup> | 1.55E <sup>-02</sup> | 1.05 | 1.52  | 6.31 |
| SCLAV_2965 | Phenylacetic acid degradation NADH oxidoreductase                 | -0.59 | 0.09  | -3.10 | 7.48E <sup>-01</sup> | 9.53E <sup>-01</sup> | 3.04E <sup>-03</sup> | 1.50 | 1.06  | 8.57 |
| SCLAV_2966 | Phenylacetic acid degradation protein                             | 0.24  | 1.16  | -2.79 | 9.45E <sup>-01</sup> | 3.44E <sup>-01</sup> | 2.30E <sup>-02</sup> | 1.18 | 2.23  | 6.92 |
| SCLAV_2967 | Phenylacetic acid degradation protein                             | 0.03  | 1.05  | -2.38 | 9.93E <sup>-01</sup> | 3.64E <sup>-01</sup> | 3.84E <sup>-02</sup> | 1.02 | 2.07  | 5.22 |
| SCLAV_2968 | Phenylacetic acid degradation protein                             | 0.53  | 2.56  | -2.13 | 8.54E <sup>-01</sup> | 3.14E <sup>-02</sup> | 1.03E <sup>-01</sup> | 1.44 | 5.90  | 4.38 |
| SCLAV_2973 | Dehydrogenase                                                     | -0.44 | -0.05 | -2.56 | 8.59E <sup>-01</sup> | 9.76E <sup>-01</sup> | 1.72E <sup>-02</sup> | 1.35 | 1.03  | 5.92 |
| SCLAV_2977 | Putative branched-chain $\alpha$ keto acid DH E1 $\alpha$ subunit | 0.00  | -0.07 | -2.80 | 1.00E+00             | 9.70E <sup>-01</sup> | 2.48E <sup>-02</sup> | 1.00 | 1.05  | 6.96 |
| SCLAV_2978 | Branched-chain $\alpha$ keto acid DH E1 $\alpha$ subunit          | -0.06 | -0.17 | -2.73 | 9.87E <sup>-01</sup> | 9.30E <sup>-01</sup> | 2.35E <sup>-02</sup> | 1.04 | 1.13  | 6.65 |
| SCLAV_2979 | Putative dihydrolipoamide acyltransferase                         | -0.16 | -0.20 | -2.58 | 9.51E <sup>-01</sup> | 8.75E <sup>-01</sup> | 4.98E <sup>-03</sup> | 1.11 | 1.15  | 5.96 |
| SCLAV_3019 | Sensor protein                                                    | 1.21  | 2.09  | 1.77  | 4.02E <sup>-01</sup> | 3.67E <sup>-02</sup> | 1.10E <sup>-01</sup> | 2.31 | 4.25  | 3.42 |
| SCLAV_3359 | Sensor protein                                                    | 2.18  | 0.29  | 0.27  | 2.10E <sup>-05</sup> | 5.54E <sup>-01</sup> | 6.99E <sup>-01</sup> | 4.53 | 1.23  | 1.21 |
| SCLAV_3535 | Monooxygenase FAD-binding protein                                 | 2.43  | 0.97  | 0.11  | 3.63E <sup>-04</sup> | 1.09E <sup>-01</sup> | 9.39E <sup>-01</sup> | 5.39 | 1.96  | 1.08 |
| SCLAV_3825 | Purine nucleoside phosphorylase                                   | 0.46  | 2.28  | 0.90  | 8.20E <sup>-01</sup> | 1.24E <sup>-02</sup> | 4.47E <sup>-01</sup> | 1.37 | 4.85  | 1.87 |
| SCLAV_3888 | Glycosyl transferase, group 1                                     | 0.44  | 2.22  | 0.47  | 8.66E <sup>-01</sup> | 3.61E <sup>-02</sup> | 8.12E <sup>-01</sup> | 1.36 | 4.65  | 1.39 |

|             |                                              |       |       |       |                      |                      |                      |       |       |      |
|-------------|----------------------------------------------|-------|-------|-------|----------------------|----------------------|----------------------|-------|-------|------|
| SCLAV_3892  | DUF946 domain-containing protein             | -3.66 | -3.88 | -2.63 | 3.76E <sup>-04</sup> | 2.50E <sup>-04</sup> | 8.40E <sup>-03</sup> | 12.63 | 14.72 | 6.20 |
| SCLAV_4039  | Putative reductase                           | -1.07 | -2.67 | 0.69  | 3.86E <sup>-01</sup> | 3.96E <sup>-03</sup> | 5.92E <sup>-01</sup> | 2.09  | 6.38  | 1.62 |
| SCLAV_4072  | CBS domain protein                           | -1.76 | -2.47 | -1.91 | 7.22E <sup>-02</sup> | 6.29E <sup>-03</sup> | 3.48E <sup>-02</sup> | 3.38  | 5.56  | 3.77 |
| SCLAV_4084  | Putative integral membrane protein           | -0.37 | -2.55 | -0.51 | 7.82E <sup>-01</sup> | 2.73E <sup>-04</sup> | 5.71E <sup>-01</sup> | 1.29  | 5.85  | 1.42 |
| SCLAV_4085  | Lipoprotein                                  | -0.15 | -2.12 | -0.07 | 9.16E <sup>-01</sup> | 2.39E <sup>-04</sup> | 9.52E <sup>-01</sup> | 1.11  | 4.35  | 1.05 |
| SCLAV_4108  | Putative polyprenyl diphosphate synthase     | -1.40 | -2.45 | 0.28  | 3.03E <sup>-01</sup> | 1.81E <sup>-02</sup> | 8.98E <sup>-01</sup> | 2.64  | 5.45  | 1.21 |
| SCLAV_4381  | FG-GAP repeat protein                        | 4.14  | -0.10 | 0.18  | 2.95E <sup>-04</sup> | 9.54E <sup>-01</sup> | 9.42E <sup>-01</sup> | 17.67 | 1.07  | 1.13 |
| SCLAV_4965  | O-methyltransferase family protein           | 0.62  | 2.57  | 0.46  | 6.06E <sup>-01</sup> | 8.52E <sup>-04</sup> | 6.82E <sup>-01</sup> | 1.54  | 5.93  | 1.37 |
| SCLAV_4967  | Putative sugar acetyltransferase             | 0.52  | 2.41  | 0.13  | 7.80E <sup>-01</sup> | 7.87E <sup>-03</sup> | 9.50E <sup>-01</sup> | 1.43  | 5.32  | 1.10 |
| SCLAV_5311  | Radical SAM domain protein                   | -2.05 | -1.53 | -0.86 | 2.40E <sup>-03</sup> | 1.84E <sup>-02</sup> | 2.65E <sup>-01</sup> | 4.15  | 2.89  | 1.81 |
| SCLAV_5317  | Glycosyl transferase, family 2               | -2.03 | -1.95 | -1.35 | 1.83E <sup>-03</sup> | 3.37E <sup>-03</sup> | 3.98E <sup>-02</sup> | 4.10  | 3.86  | 2.55 |
| SCLAV_5318  | Putative oxidoreductase                      | -2.90 | -2.42 | -2.34 | 4.13E <sup>-03</sup> | 1.33E <sup>-02</sup> | 2.14E <sup>-02</sup> | 7.45  | 5.36  | 5.06 |
| SCLAV_5396  | GCN5-related N-acetyltransferase             | 0.28  | 2.69  | 0.12  | 9.04E <sup>-01</sup> | 2.93E <sup>-03</sup> | 9.52E <sup>-01</sup> | 1.21  | 6.43  | 1.09 |
| SCLAV_5448  | Rare lipoprotein A                           | 0.26  | -0.08 | -2.13 | 9.25E <sup>-01</sup> | 9.61E <sup>-01</sup> | 4.15E <sup>-02</sup> | 1.20  | 1.06  | 4.37 |
| SCLAV_5505  | Phenylacetate-CoA ligase                     | 0.12  | 0.19  | -2.31 | 9.66E <sup>-01</sup> | 9.00E <sup>-01</sup> | 1.58E <sup>-02</sup> | 1.09  | 1.14  | 4.95 |
| SCLAV_5641  | Cytochrome P450                              | 0.36  | 2.06  | 0.18  | 8.88E <sup>-01</sup> | 3.91E <sup>-02</sup> | 9.40E <sup>-01</sup> | 1.28  | 4.16  | 1.13 |
| SCLAV_nr015 | nocoRNAC: SIDD_value 3.5, Term_Confidence 93 | -0.18 | -2.02 | -1.17 | 8.99E <sup>-01</sup> | 8.89E <sup>-04</sup> | 4.42E <sup>-02</sup> | 1.14  | 4.05  | 2.25 |
| SCLAV_nr066 | nocoRNAC: SIDD_value 4.0, Term_Confidence 91 | -2.01 | -2.05 | -2.70 | 3.34E <sup>-02</sup> | 1.82E <sup>-02</sup> | 4.98E <sup>-03</sup> | 4.01  | 4.15  | 6.52 |
| SCLAV_nr129 | nocoRNAC: SIDD_value 1.8, Term_Confidence 70 | 3.07  | -0.07 | -0.08 | 1.27E <sup>-03</sup> | 9.63E <sup>-01</sup> | 9.72E <sup>-01</sup> | 8.40  | 1.05  | 1.05 |
| SCLAV_p0107 | Transposase                                  | 0.34  | 2.19  | 0.44  | 8.69E <sup>-01</sup> | 1.02E <sup>-02</sup> | 7.62E <sup>-01</sup> | 1.27  | 4.57  | 1.36 |
| SCLAV_p0109 | Putative glycosyltransferase                 | -0.26 | -2.44 | 0.82  | 9.18E <sup>-01</sup> | 9.39E <sup>-03</sup> | 5.13E <sup>-01</sup> | 1.20  | 5.43  | 1.77 |
| SCLAV_p0140 | Glycosyltransferase-like protein             | 0.38  | 2.23  | 0.10  | 8.07E <sup>-01</sup> | 2.93E <sup>-03</sup> | 9.51E <sup>-01</sup> | 1.30  | 4.68  | 1.07 |
| SCLAV_p0346 | NUDIX hydrolase                              | 2.70  | -0.07 | 0.52  | 8.34E <sup>-04</sup> | 9.58E <sup>-01</sup> | 6.65E <sup>-01</sup> | 6.52  | 1.05  | 1.44 |
| SCLAV_p0347 | Transposase                                  | 2.39  | 0.05  | 0.08  | 9.85E <sup>-06</sup> | 9.40E <sup>-01</sup> | 9.26E <sup>-01</sup> | 5.26  | 1.04  | 1.06 |
| SCLAV_p0475 | SNARE associated protein                     | 0.20  | 2.21  | 0.75  | 9.50E <sup>-01</sup> | 3.01E <sup>-02</sup> | 6.29E <sup>-01</sup> | 1.15  | 4.62  | 1.68 |
| SCLAV_p0540 | Cutinase domain-containing protein           | -0.14 | -3.33 | -1.45 | 9.71E <sup>-01</sup> | 9.21E <sup>-03</sup> | 3.50E <sup>-01</sup> | 1.10  | 10.09 | 2.73 |
| SCLAV_p0560 | Multimeric flavodoxin WrbA                   | 2.73  | 0.85  | -0.18 | 7.22E <sup>-04</sup> | 2.70E <sup>-01</sup> | 9.12E <sup>-01</sup> | 6.63  | 1.81  | 1.13 |

|                                              |                                                         |       |       |       |                      |                      |                      |       |       |      |
|----------------------------------------------|---------------------------------------------------------|-------|-------|-------|----------------------|----------------------|----------------------|-------|-------|------|
| SCLAV_p0573                                  | Cytochrome P450                                         | 0.11  | -2.91 | -0.14 | 9.67E <sup>-01</sup> | 1.82E <sup>-03</sup> | 9.46E <sup>-01</sup> | 1.08  | 7.53  | 1.10 |
| SCLAV_p0787                                  | Putative ribose 5-phosphate isomerase                   | -2.25 | -3.37 | -1.10 | 4.42E <sup>-02</sup> | 2.02E <sup>-03</sup> | 4.01E <sup>-01</sup> | 4.76  | 10.36 | 2.15 |
| SCLAV_p0789                                  | Fe-S oxidoreductase                                     | -1.45 | -2.07 | -0.91 | 1.66E <sup>-01</sup> | 1.84E <sup>-02</sup> | 4.30E <sup>-01</sup> | 2.74  | 4.20  | 1.87 |
| SCLAV_p0790                                  | Phosphorylase                                           | -1.67 | -2.79 | -0.84 | 5.21E <sup>-02</sup> | 1.06E <sup>-03</sup> | 4.05E <sup>-01</sup> | 3.18  | 6.94  | 1.79 |
| SCLAV_p0794                                  | Putative PP-dependent aminotransferase                  | -0.14 | -2.56 | -0.38 | 9.12E <sup>-01</sup> | 4.26E <sup>-06</sup> | 5.53E <sup>-01</sup> | 1.10  | 5.91  | 1.30 |
| SCLAV_p0797                                  | Favin-dependent oxidoreductase                          | -0.84 | -2.74 | 0.28  | 3.53E <sup>-01</sup> | 2.50E <sup>-04</sup> | 8.23E <sup>-01</sup> | 1.79  | 6.69  | 1.21 |
| SCLAV_p0798                                  | Class II aldolase, N-terminal domain-containing protein | -0.63 | -3.26 | 0.23  | 5.79E <sup>-01</sup> | 5.41E <sup>-05</sup> | 8.63E <sup>-01</sup> | 1.54  | 9.55  | 1.17 |
| SCLAV_p0799                                  | Protein kinase                                          | -0.58 | -3.79 | -0.17 | 7.29E <sup>-01</sup> | 8.48E <sup>-05</sup> | 9.27E <sup>-01</sup> | 1.49  | 13.84 | 1.13 |
| SCLAV_p0855                                  | Glyoxalase/bleomycin resistance protein/dioxygenase     | -3.87 | -2.26 | -0.85 | 2.05E <sup>-02</sup> | 1.39E <sup>-01</sup> | 7.53E <sup>-01</sup> | 14.60 | 4.80  | 1.80 |
| SCLAV_p1035                                  | DUF1326 domain-containing protein                       | 0.85  | 2.18  | 0.20  | 6.42E <sup>-01</sup> | 3.03E <sup>-02</sup> | 9.28E <sup>-01</sup> | 1.81  | 4.53  | 1.15 |
| SCLAV_p1197                                  | Phage tail protein                                      | -2.71 | -4.22 | -2.80 | 7.76E <sup>-02</sup> | 3.43E <sup>-03</sup> | 5.02E <sup>-02</sup> | 6.54  | 18.62 | 6.98 |
| SCLAV_p1198                                  | Tail sheath protein                                     | -2.81 | -4.49 | -2.89 | 5.93E <sup>-02</sup> | 1.88E <sup>-03</sup> | 3.93E <sup>-02</sup> | 7.02  | 22.44 | 7.41 |
| SCLAV_p1200                                  | Hydrolytic protein                                      | -2.62 | -4.44 | -2.71 | 8.56E <sup>-02</sup> | 1.76E <sup>-03</sup> | 4.89E <sup>-02</sup> | 6.15  | 21.78 | 6.54 |
| SCLAV_p1254                                  | Co F420-dependent N5 N10-methylene THMR                 | 0.55  | 2.04  | 0.54  | 6.80E <sup>-01</sup> | 6.02E <sup>-03</sup> | 6.12E <sup>-01</sup> | 1.47  | 4.12  | 1.45 |
| SCLAV_p1537                                  | Putative subunit of transposase                         | 0.55  | 2.15  | 0.44  | 7.24E <sup>-01</sup> | 7.99E <sup>-03</sup> | 7.40E <sup>-01</sup> | 1.46  | 4.45  | 1.36 |
| SCLAV_t012                                   | tRNA-Met                                                | 0.56  | 1.32  | 2.85  | 3.75E <sup>-01</sup> | 5.62E <sup>-03</sup> | 6.56E <sup>-07</sup> | 1.47  | 2.49  | 7.23 |
| <b>Secondary metabolite cluster proteins</b> |                                                         |       |       |       |                      |                      |                      |       |       |      |
| SCLAV_0159                                   | Germacradienol/germacrene D synthase                    | -0.14 | -2.14 | 1.16  | 9.46E <sup>-01</sup> | 4.12E <sup>-03</sup> | 1.44E <sup>-01</sup> | 1.10  | 4.41  | 2.23 |
| SCLAV_0476                                   | Hypothetical protein                                    | -1.54 | -2.00 | -2.41 | 2.38E <sup>-01</sup> | 4.95E <sup>-02</sup> | 2.52E <sup>-02</sup> | 2.91  | 4.00  | 5.31 |
| SCLAV_2457                                   | Putative kinase                                         | -0.66 | -2.80 | -1.68 | 4.72E <sup>-01</sup> | 8.48E <sup>-05</sup> | 9.17E <sup>-03</sup> | 1.58  | 6.99  | 3.20 |
| SCLAV_2459                                   | Hypothetical protein                                    | -0.57 | -2.68 | -1.33 | 5.53E <sup>-01</sup> | 8.48E <sup>-05</sup> | 3.16E <sup>-02</sup> | 1.49  | 6.41  | 2.51 |
| SCLAV_2461                                   | DUF574 domain-containing protein                        | -0.46 | -2.20 | -0.97 | 6.41E <sup>-01</sup> | 2.73E <sup>-04</sup> | 9.85E <sup>-02</sup> | 1.37  | 4.60  | 1.96 |
| SCLAV_2462                                   | Hypothetical protein                                    | -0.59 | -2.35 | -0.75 | 6.55E <sup>-01</sup> | 2.33E <sup>-03</sup> | 4.29E <sup>-01</sup> | 1.51  | 5.11  | 1.68 |
| SCLAV_2463                                   | NUDIX hydrolase                                         | -0.92 | -2.46 | -1.40 | 3.59E <sup>-01</sup> | 1.93E <sup>-03</sup> | 7.69E <sup>-02</sup> | 1.90  | 5.51  | 2.64 |
| SCLAV_2925                                   | Clavamate synthase 1                                    | 0.07  | 2.03  | -0.01 | 9.82E <sup>-01</sup> | 3.76E <sup>-02</sup> | 9.96E <sup>-01</sup> | 1.05  | 4.10  | 1.01 |
| SCLAV_4181                                   | Biotin carboxylase                                      | -0.11 | -0.05 | -2.23 | 9.62E <sup>-01</sup> | 9.70E <sup>-01</sup> | 6.62E <sup>-03</sup> | 1.08  | 1.03  | 4.68 |
| SCLAV_4200                                   | N-δ (α-aminoadipyl-L-cysteinyl-D-valine) synthetase     | 0.57  | 0.11  | -2.81 | 7.39E <sup>-01</sup> | 9.38E <sup>-01</sup> | 3.85E <sup>-03</sup> | 1.48  | 1.08  | 7.03 |

|             |                                                                            |       |       |       |                      |                      |                      |      |       |      |
|-------------|----------------------------------------------------------------------------|-------|-------|-------|----------------------|----------------------|----------------------|------|-------|------|
| SCLAV_4201  | L-lysine-epsilon aminotransferase                                          | 0.28  | 0.42  | -2.56 | 9.25E <sup>-01</sup> | 7.65E <sup>-01</sup> | 1.74E <sup>-02</sup> | 1.21 | 1.34  | 5.89 |
| SCLAV_4205  | 3'-hydroxymethylcephem-O-carbamoyltransferase                              | 0.37  | 0.22  | -2.45 | 8.49E <sup>-01</sup> | 8.63E <sup>-01</sup> | 5.67E <sup>-03</sup> | 1.29 | 1.16  | 5.46 |
| SCLAV_4206  | Deacetoxycephalosporin C hydroxylase                                       | 0.63  | 0.83  | -2.43 | 7.92E <sup>-01</sup> | 5.10E <sup>-01</sup> | 3.80E <sup>-02</sup> | 1.55 | 1.78  | 5.39 |
| SCLAV_4207  | Hypothetical protein                                                       | 0.57  | 0.66  | -2.88 | 8.19E <sup>-01</sup> | 6.20E <sup>-01</sup> | 1.38E <sup>-02</sup> | 1.49 | 1.59  | 7.38 |
| SCLAV_4208  | Cephalosporin hydroxylase Cmcl                                             | 0.59  | 0.61  | -2.23 | 7.84E <sup>-01</sup> | 6.17E <sup>-01</sup> | 3.57E <sup>-02</sup> | 1.51 | 1.52  | 4.69 |
| SCLAV_4210  | Isopenicillin N epimerase                                                  | 0.60  | 0.55  | -2.63 | 8.14E <sup>-01</sup> | 7.09E <sup>-01</sup> | 2.91E <sup>-02</sup> | 1.52 | 1.47  | 6.20 |
| SCLAV_4387  | Mg <sup>2+</sup> or Mn <sup>2+</sup> -dependent protein phosphatase, prpM4 | -2.28 | -2.34 | -1.98 | 4.90E <sup>-02</sup> | 2.51E <sup>-02</sup> | 7.90E <sup>-02</sup> | 4.86 | 5.06  | 3.94 |
| SCLAV_4755  | Hypothetical protein                                                       | -1.12 | -2.70 | -0.19 | 4.14E <sup>-01</sup> | 7.04E <sup>-03</sup> | 9.28E <sup>-01</sup> | 2.18 | 6.49  | 1.14 |
| SCLAV_4756  | Polyprenyl synthetase                                                      | -0.88 | -2.46 | -0.02 | 5.75E <sup>-01</sup> | 9.85E <sup>-03</sup> | 9.94E <sup>-01</sup> | 1.84 | 5.50  | 1.01 |
| SCLAV_4757  | Hypothetical protein                                                       | -0.47 | -2.53 | 0.33  | 8.27E <sup>-01</sup> | 9.58E <sup>-03</sup> | 8.60E <sup>-01</sup> | 1.39 | 5.79  | 1.26 |
| SCLAV_5143  | Hypothetical protein                                                       | 0.57  | 2.22  | 0.63  | 7.38E <sup>-01</sup> | 1.02E <sup>-02</sup> | 6.26E <sup>-01</sup> | 1.49 | 4.67  | 1.55 |
| SCLAV_5341  | Hypothetical protein                                                       | 0.84  | 2.28  | 0.41  | 5.36E <sup>-01</sup> | 9.13E <sup>-03</sup> | 7.86E <sup>-01</sup> | 1.79 | 4.87  | 1.33 |
| SCLAV_5616  | ATP/GTP-binding protein                                                    | 3.20  | 0.49  | 0.49  | 2.22E <sup>-03</sup> | 7.06E <sup>-01</sup> | 7.83E <sup>-01</sup> | 9.21 | 1.40  | 1.41 |
| SCLAV_p0574 | Pentalene synthase                                                         | 0.11  | -2.21 | -0.58 | 9.63E <sup>-01</sup> | 9.52E <sup>-03</sup> | 6.57E <sup>-01</sup> | 1.08 | 4.62  | 1.49 |
| SCLAV_p1079 | Putative transcriptional regulator                                         | 0.21  | 2.05  | 0.45  | 9.14E <sup>-01</sup> | 4.47E <sup>-03</sup> | 6.82E <sup>-01</sup> | 1.16 | 4.14  | 1.37 |
| SCLAV_p1112 | Staurosporine biosynthesis 4-ketoreductase StaK                            | 0.76  | 2.07  | 0.42  | 5.88E <sup>-01</sup> | 1.33E <sup>-02</sup> | 7.74E <sup>-01</sup> | 1.70 | 4.20  | 1.34 |
| SCLAV_p1187 | Hypothetical protein                                                       | -1.28 | -2.59 | -1.50 | 1.75E <sup>-01</sup> | 2.02E <sup>-03</sup> | 7.25E <sup>-02</sup> | 2.43 | 6.00  | 2.83 |
| SCLAV_p1190 | GPW/gp25 family protein                                                    | -1.34 | -2.97 | -1.98 | 2.38E <sup>-01</sup> | 2.02E <sup>-03</sup> | 3.50E <sup>-02</sup> | 2.53 | 7.82  | 3.95 |
| SCLAV_p1191 | Rhs element Vgr protein                                                    | -1.05 | -2.58 | -2.37 | 4.06E <sup>-01</sup> | 4.47E <sup>-03</sup> | 9.79E <sup>-03</sup> | 2.07 | 5.99  | 5.15 |
| SCLAV_p1192 | Peptidoglycan-binding LysM                                                 | -1.72 | -3.33 | -1.91 | 1.48E <sup>-01</sup> | 2.02E <sup>-03</sup> | 7.67E <sup>-02</sup> | 3.31 | 10.03 | 3.75 |
| SCLAV_p1193 | Phage tail protein                                                         | -1.78 | -3.46 | -2.30 | 1.92E <sup>-01</sup> | 3.48E <sup>-03</sup> | 5.09E <sup>-02</sup> | 3.44 | 11.04 | 4.93 |
| SCLAV_p1194 | PAT1 domain-containing protein                                             | -0.65 | -2.73 | -1.39 | 8.04E <sup>-01</sup> | 2.13E <sup>-02</sup> | 3.50E <sup>-01</sup> | 1.57 | 6.65  | 2.61 |
| SCLAV_p1225 | Valine decarboxylase                                                       | -0.56 | -2.31 | -0.64 | 7.48E <sup>-01</sup> | 9.17E <sup>-03</sup> | 6.16E <sup>-01</sup> | 1.47 | 4.96  | 1.56 |
| SCLAV_p1263 | Putative amine oxidoreductase                                              | 0.43  | 2.79  | 0.01  | 5.85E <sup>-01</sup> | 2.93E <sup>-06</sup> | 9.91E <sup>-01</sup> | 1.35 | 6.91  | 1.01 |
| SCLAV_p1264 | AMP-dependent synthetase and ligase                                        | 0.25  | 2.65  | 0.13  | 7.75E <sup>-01</sup> | 1.96E <sup>-06</sup> | 8.78E <sup>-01</sup> | 1.19 | 6.27  | 1.09 |
| SCLAV_p1265 | Cyclopropane-fatty-acyl-phospholipid synthase                              | 0.03  | 2.84  | -0.38 | 9.91E <sup>-01</sup> | 1.45E <sup>-03</sup> | 7.93E <sup>-01</sup> | 1.02 | 7.14  | 1.30 |
| SCLAV_p1266 | Putative acyl-acyl desaturase                                              | 0.08  | 2.72  | -0.21 | 9.71E <sup>-01</sup> | 4.25E <sup>-04</sup> | 8.84E <sup>-01</sup> | 1.06 | 6.59  | 1.16 |

|                                  |                                    |       |       |       |                      |                      |                      |      |       |       |
|----------------------------------|------------------------------------|-------|-------|-------|----------------------|----------------------|----------------------|------|-------|-------|
| SCLAV_p1268                      | Hypothetical protein               | -0.10 | 2.41  | -0.83 | 9.71E <sup>-01</sup> | 6.50E <sup>-03</sup> | 4.62E <sup>-01</sup> | 1.07 | 5.31  | 1.78  |
| SCLAV_p1269                      | Acyltransferase                    | 0.16  | 2.44  | -0.02 | 9.31E <sup>-01</sup> | 4.82E <sup>-04</sup> | 9.87E <sup>-01</sup> | 1.11 | 5.44  | 1.02  |
| SCLAV_p1309                      | Thioesterase II                    | 0.04  | 2.31  | 0.04  | 9.77E <sup>-01</sup> | 6.96E <sup>-05</sup> | 9.70E <sup>-01</sup> | 1.03 | 4.96  | 1.03  |
| SCLAV_p1363                      | Monoxygenase FAD-binding protein   | 0.53  | 2.42  | -0.10 | 7.29E <sup>-01</sup> | 3.18E <sup>-03</sup> | 9.58E <sup>-01</sup> | 1.45 | 5.33  | 1.07  |
| SCLAV_p1373                      | Hypothetical protein               | 0.65  | 2.02  | 0.26  | 7.38E <sup>-01</sup> | 3.33E <sup>-02</sup> | 8.96E <sup>-01</sup> | 1.56 | 4.06  | 1.20  |
| SCLAV_p1428                      | Prenyltransferase/squalene oxidase | -2.05 | -1.53 | -1.24 | 4.19E <sup>-02</sup> | 8.99E <sup>-02</sup> | 2.49E <sup>-01</sup> | 4.15 | 2.88  | 2.37  |
| SCLAV_p1432                      | Hypothetical protein               | 0.29  | 2.77  | 0.57  | 9.23E <sup>-01</sup> | 1.03E <sup>-02</sup> | 7.57E <sup>-01</sup> | 1.23 | 6.80  | 1.49  |
| SCLAV_p1471                      | Hypothetical protein               | 0.23  | 2.30  | 0.04  | 9.31E <sup>-01</sup> | 1.41E <sup>-02</sup> | 9.85E <sup>-01</sup> | 1.17 | 4.94  | 1.03  |
| <b>Hypothetical Proteins (1)</b> |                                    |       |       |       |                      |                      |                      |      |       |       |
| SCLAV_0035                       | Hypothetical protein               | -0.17 | -2.43 | -2.10 | 9.42E <sup>-01</sup> | 3.85E <sup>-03</sup> | 1.21E <sup>-02</sup> | 1.13 | 5.39  | 4.27  |
| SCLAV_0195                       | Hypothetical protein               | 0.27  | 2.53  | 0.62  | 9.17E <sup>-01</sup> | 8.45E <sup>-03</sup> | 6.74E <sup>-01</sup> | 1.20 | 5.79  | 1.54  |
| SCLAV_0527                       | Hypothetical protein               | 2.04  | 3.07  | 4.60  | 1.02E <sup>-02</sup> | 2.73E <sup>-04</sup> | 9.31E <sup>-07</sup> | 4.12 | 8.38  | 24.28 |
| SCLAV_0528                       | Hypothetical protein               | 0.77  | -0.04 | 3.08  | 3.35E <sup>-01</sup> | 9.64E <sup>-01</sup> | 9.95E <sup>-06</sup> | 1.70 | 1.03  | 8.47  |
| SCLAV_1658                       | Hypothetical protein               | 2.63  | 1.90  | 1.00  | 8.64E <sup>-03</sup> | 2.83E <sup>-02</sup> | 3.57E <sup>-01</sup> | 6.17 | 3.72  | 2.01  |
| SCLAV_1664                       | Hypothetical protein               | 1.06  | 1.96  | 3.01  | 2.14E <sup>-02</sup> | 8.48E <sup>-05</sup> | 1.47E <sup>-07</sup> | 2.09 | 3.89  | 8.05  |
| SCLAV_1665                       | Hypothetical protein               | 0.26  | 0.58  | 2.07  | 8.45E <sup>-01</sup> | 3.07E <sup>-01</sup> | 3.02E <sup>-03</sup> | 1.19 | 1.49  | 4.20  |
| SCLAV_1819                       | Hypothetical protein               | 0.58  | 2.35  | 0.89  | 8.25E <sup>-01</sup> | 3.97E <sup>-02</sup> | 6.08E <sup>-01</sup> | 1.49 | 5.11  | 1.85  |
| SCLAV_1971                       | Hypothetical protein               | -2.06 | -1.46 | 1.42  | 4.28E <sup>-02</sup> | 1.06E <sup>-01</sup> | 1.73E <sup>-01</sup> | 4.16 | 2.75  | 2.67  |
| SCLAV_2477                       | Hypothetical protein               | 0.40  | 3.46  | 0.44  | 8.80E <sup>-01</sup> | 4.37E <sup>-03</sup> | 8.25E <sup>-01</sup> | 1.32 | 10.97 | 1.36  |
| SCLAV_2496                       | Hypothetical protein               | 0.74  | 2.40  | 0.43  | 6.30E <sup>-01</sup> | 7.87E <sup>-03</sup> | 7.83E <sup>-01</sup> | 1.67 | 5.27  | 1.34  |
| SCLAV_2500                       | Hypothetical protein               | 0.80  | 2.81  | 0.87  | 6.51E <sup>-01</sup> | 5.51E <sup>-03</sup> | 5.13E <sup>-01</sup> | 1.74 | 7.00  | 1.83  |
| SCLAV_2956                       | Hypothetical protein               | 2.53  | 1.70  | 0.71  | 1.62E <sup>-04</sup> | 6.38E <sup>-03</sup> | 3.33E <sup>-01</sup> | 5.77 | 3.26  | 1.64  |
| SCLAV_2957                       | Hypothetical protein               | 2.46  | 1.69  | 0.67  | 5.25E <sup>-04</sup> | 1.07E <sup>-02</sup> | 4.33E <sup>-01</sup> | 5.48 | 3.23  | 1.59  |
| SCLAV_3072                       | Hypothetical protein               | 0.34  | 2.26  | -0.05 | 8.66E <sup>-01</sup> | 9.21E <sup>-03</sup> | 9.77E <sup>-01</sup> | 1.27 | 4.80  | 1.04  |
| SCLAV_3217                       | Hypothetical protein               | -0.03 | 2.05  | 0.71  | 9.92E <sup>-01</sup> | 7.25E <sup>-03</sup> | 4.65E <sup>-01</sup> | 1.02 | 4.13  | 1.64  |
| SCLAV_3317                       | Hypothetical protein               | 0.39  | -2.32 | 0.30  | 8.53E <sup>-01</sup> | 1.02E <sup>-02</sup> | 8.66E <sup>-01</sup> | 1.31 | 5.00  | 1.23  |
| SCLAV_3356                       | Hypothetical protein               | 2.10  | 0.93  | 0.86  | 3.90E <sup>-02</sup> | 3.34E <sup>-01</sup> | 4.97E <sup>-01</sup> | 4.29 | 1.91  | 1.81  |



|             |                      |       |       |       |                      |                      |                      |       |       |      |
|-------------|----------------------|-------|-------|-------|----------------------|----------------------|----------------------|-------|-------|------|
| SCLAV_3357  | Hypothetical protein | 2.67  | 0.56  | 0.47  | 1.22E <sup>-02</sup> | 6.53E <sup>-01</sup> | 7.96E <sup>-01</sup> | 6.36  | 1.47  | 1.38 |
| SCLAV_3367  | Hypothetical protein | 0.14  | 2.11  | 0.07  | 9.54E <sup>-01</sup> | 9.44E <sup>-03</sup> | 9.68E <sup>-01</sup> | 1.10  | 4.31  | 1.05 |
| SCLAV_3457  | Hypothetical protein | 2.66  | 1.32  | 0.73  | 5.24E <sup>-04</sup> | 5.89E <sup>-02</sup> | 4.31E <sup>-01</sup> | 6.30  | 2.49  | 1.66 |
| SCLAV_3478  | Hypothetical protein | -1.44 | -2.37 | -1.64 | 6.67E <sup>-02</sup> | 1.81E <sup>-03</sup> | 2.51E <sup>-02</sup> | 2.71  | 5.17  | 3.11 |
| SCLAV_3510  | Hypothetical protein | -1.65 | -3.67 | -2.34 | 2.63E <sup>-01</sup> | 2.76E <sup>-03</sup> | 5.40E <sup>-02</sup> | 3.14  | 12.72 | 5.06 |
| SCLAV_3562  | Hypothetical protein | 5.86  | 3.83  | 3.20  | 8.66E <sup>-04</sup> | 2.10E <sup>-02</sup> | 7.03E <sup>-02</sup> | 57.92 | 14.25 | 9.21 |
| SCLAV_3846  | Hypothetical protein | -0.76 | -3.41 | -2.40 | 5.80E <sup>-01</sup> | 2.21E <sup>-04</sup> | 6.20E <sup>-03</sup> | 1.69  | 10.65 | 5.29 |
| SCLAV_3859  | Hypothetical protein | 0.97  | 3.22  | 0.23  | 5.16E <sup>-01</sup> | 1.76E <sup>-03</sup> | 9.11E <sup>-01</sup> | 1.96  | 9.33  | 1.17 |
| SCLAV_3874  | Hypothetical protein | 0.10  | 0.24  | 2.53  | 9.76E <sup>-01</sup> | 8.86E <sup>-01</sup> | 2.25E <sup>-02</sup> | 1.07  | 1.18  | 5.78 |
| SCLAV_3894  | Hypothetical protein | 2.89  | 2.64  | 1.08  | 6.59E <sup>-03</sup> | 1.02E <sup>-02</sup> | 4.09E <sup>-01</sup> | 7.41  | 6.25  | 2.12 |
| SCLAV_3996  | Hypothetical protein | 0.25  | -3.00 | -0.07 | 9.42E <sup>-01</sup> | 1.12E <sup>-02</sup> | 9.82E <sup>-01</sup> | 1.19  | 8.01  | 1.05 |
| SCLAV_4311  | Hypothetical protein | 0.21  | 2.93  | 2.11  | 9.25E <sup>-01</sup> | 8.89E <sup>-04</sup> | 1.24E <sup>-02</sup> | 1.16  | 7.65  | 4.32 |
| SCLAV_4378  | Hypothetical protein | 4.55  | 0.64  | 0.37  | 1.86E <sup>-04</sup> | 6.28E <sup>-01</sup> | 8.64E <sup>-01</sup> | 23.41 | 1.56  | 1.30 |
| SCLAV_4379  | Hypothetical protein | 4.08  | 0.07  | 0.04  | 5.86E <sup>-04</sup> | 9.67E <sup>-01</sup> | 9.88E <sup>-01</sup> | 16.96 | 1.05  | 1.03 |
| SCLAV_4380  | Hypothetical protein | 4.46  | 0.63  | 0.55  | 5.70E <sup>-04</sup> | 7.09E <sup>-01</sup> | 8.03E <sup>-01</sup> | 22.00 | 1.54  | 1.46 |
| SCLAV_5061  | Hypothetical protein | -0.22 | 2.08  | 0.40  | 9.21E <sup>-01</sup> | 1.02E <sup>-02</sup> | 7.77E <sup>-01</sup> | 1.17  | 4.24  | 1.32 |
| SCLAV_5161  | Hypothetical protein | 2.87  | 1.34  | 0.55  | 1.84E <sup>-04</sup> | 4.78E <sup>-02</sup> | 5.84E <sup>-01</sup> | 7.30  | 2.54  | 1.46 |
| SCLAV_5313  | Hypothetical protein | -2.03 | -1.61 | -1.25 | 4.07E <sup>-03</sup> | 1.82E <sup>-02</sup> | 8.74E <sup>-02</sup> | 4.09  | 3.05  | 2.38 |
| SCLAV_5319  | Hypothetical protein | -3.22 | -2.35 | -2.90 | 1.43E <sup>-02</sup> | 5.45E <sup>-02</sup> | 2.45E <sup>-02</sup> | 9.31  | 5.08  | 7.48 |
| SCLAV_5383  | Hypothetical protein | 0.30  | 2.06  | 0.22  | 8.79E <sup>-01</sup> | 9.86E <sup>-03</sup> | 8.93E <sup>-01</sup> | 1.23  | 4.16  | 1.17 |
| SCLAV_p0086 | Hypothetical protein | 1.40  | 2.14  | 1.33  | 3.18E <sup>-01</sup> | 3.93E <sup>-02</sup> | 2.99E <sup>-01</sup> | 2.65  | 4.41  | 2.51 |
| SCLAV_p0120 | Hypothetical protein | 0.41  | 2.21  | 0.17  | 8.04E <sup>-01</sup> | 4.89E <sup>-03</sup> | 9.20E <sup>-01</sup> | 1.33  | 4.62  | 1.12 |
| SCLAV_p0174 | Hypothetical protein | 0.16  | 2.27  | 0.05  | 9.55E <sup>-01</sup> | 2.03E <sup>-02</sup> | 9.83E <sup>-01</sup> | 1.12  | 4.81  | 1.04 |
| SCLAV_p0179 | Hypothetical protein | 0.50  | 2.00  | 1.26  | 8.28E <sup>-01</sup> | 4.64E <sup>-02</sup> | 3.14E <sup>-01</sup> | 1.42  | 4.00  | 2.39 |
| SCLAV_p0249 | Hypothetical protein | 0.90  | 2.09  | 1.35  | 6.46E <sup>-01</sup> | 4.80E <sup>-02</sup> | 3.02E <sup>-01</sup> | 1.86  | 4.27  | 2.54 |
| SCLAV_p0251 | Hypothetical protein | 0.87  | 2.61  | 0.64  | 6.02E <sup>-01</sup> | 9.17E <sup>-03</sup> | 6.79E <sup>-01</sup> | 1.83  | 6.10  | 1.56 |
| SCLAV_p0314 | Hypothetical protein | 1.33  | 1.45  | 2.15  | 3.02E <sup>-01</sup> | 1.28E <sup>-01</sup> | 3.49E <sup>-02</sup> | 2.51  | 2.74  | 4.44 |

|             |                      |       |       |       |                      |                      |                      |      |       |      |
|-------------|----------------------|-------|-------|-------|----------------------|----------------------|----------------------|------|-------|------|
| SCLAV_p0350 | Hypothetical protein | 2.58  | 0.51  | -0.20 | 4.61E <sup>-02</sup> | 7.40E <sup>-01</sup> | 9.44E <sup>-01</sup> | 5.96 | 1.43  | 1.15 |
| SCLAV_p0398 | Hypothetical protein | -1.24 | -2.12 | 0.16  | 2.13E <sup>-01</sup> | 9.58E <sup>-03</sup> | 9.28E <sup>-01</sup> | 2.36 | 4.35  | 1.12 |
| SCLAV_p0465 | Hypothetical protein | -0.16 | -2.00 | -0.27 | 9.54E <sup>-01</sup> | 2.58E <sup>-02</sup> | 8.86E <sup>-01</sup> | 1.12 | 4.01  | 1.20 |
| SCLAV_p0603 | Hypothetical protein | -0.95 | -2.89 | -1.76 | 7.20E <sup>-01</sup> | 2.96E <sup>-02</sup> | 2.67E <sup>-01</sup> | 1.93 | 7.40  | 3.40 |
| SCLAV_p0604 | Hypothetical protein | -1.07 | -3.09 | -1.92 | 5.47E <sup>-01</sup> | 6.73E <sup>-03</sup> | 1.07E <sup>-01</sup> | 2.10 | 8.52  | 3.79 |
| SCLAV_p0605 | Hypothetical protein | -1.64 | -3.42 | -1.39 | 2.34E <sup>-01</sup> | 3.37E <sup>-03</sup> | 2.96E <sup>-01</sup> | 3.13 | 10.71 | 2.62 |
| SCLAV_p0606 | Hypothetical protein | -1.51 | -3.05 | -1.61 | 1.63E <sup>-01</sup> | 1.82E <sup>-03</sup> | 1.03E <sup>-01</sup> | 2.85 | 8.30  | 3.06 |
| SCLAV_p0717 | Hypothetical protein | 2.24  | 1.41  | -0.12 | 6.43E <sup>-04</sup> | 2.07E <sup>-02</sup> | 9.28E <sup>-01</sup> | 4.71 | 2.66  | 1.09 |
| SCLAV_p0752 | Hypothetical protein | 2.34  | 0.49  | 0.58  | 5.12E <sup>-05</sup> | 4.01E <sup>-01</sup> | 3.49E <sup>-01</sup> | 5.05 | 1.40  | 1.50 |
| SCLAV_p0756 | Hypothetical protein | 3.12  | 0.57  | 0.32  | 2.12E <sup>-05</sup> | 3.93E <sup>-01</sup> | 7.67E <sup>-01</sup> | 8.70 | 1.48  | 1.25 |
| SCLAV_p0792 | Hypothetical protein | -0.90 | -2.08 | -0.60 | 2.20E <sup>-01</sup> | 1.37E <sup>-03</sup> | 4.38E <sup>-01</sup> | 1.87 | 4.23  | 1.52 |
| SCLAV_p0800 | Hypothetical protein | -1.02 | -4.71 | -1.40 | 7.04E <sup>-01</sup> | 1.72E <sup>-03</sup> | 4.40E <sup>-01</sup> | 2.02 | 26.19 | 2.64 |
| SCLAV_p0840 | Hypothetical protein | 2.21  | 1.15  | 0.03  | 1.18E <sup>-02</sup> | 1.57E <sup>-01</sup> | 9.90E <sup>-01</sup> | 4.63 | 2.23  | 1.02 |
| SCLAV_p1004 | Hypothetical protein | 0.81  | 2.54  | 0.46  | 6.17E <sup>-01</sup> | 8.05E <sup>-03</sup> | 7.79E <sup>-01</sup> | 1.75 | 5.82  | 1.38 |
| SCLAV_p1068 | Hypothetical protein | 0.53  | 3.18  | 0.51  | 8.07E <sup>-01</sup> | 2.28E <sup>-03</sup> | 7.67E <sup>-01</sup> | 1.44 | 9.06  | 1.42 |
| SCLAV_p1086 | Hypothetical protein | 3.00  | 1.59  | 1.08  | 4.71E <sup>-03</sup> | 1.10E <sup>-01</sup> | 4.13E <sup>-01</sup> | 7.98 | 3.00  | 2.11 |
| SCLAV_p1087 | Hypothetical protein | 2.88  | 1.55  | 0.50  | 2.35E <sup>-04</sup> | 4.24E <sup>-02</sup> | 6.54E <sup>-01</sup> | 7.39 | 2.93  | 1.41 |
| SCLAV_p1104 | Hypothetical protein | 0.56  | 2.35  | 0.51  | 7.34E <sup>-01</sup> | 6.49E <sup>-03</sup> | 7.05E <sup>-01</sup> | 1.48 | 5.10  | 1.42 |
| SCLAV_p1204 | Hypothetical protein | -1.39 | -2.91 | -2.31 | 4.03E <sup>-01</sup> | 8.86E <sup>-03</sup> | 3.99E <sup>-02</sup> | 2.62 | 7.53  | 4.96 |
| SCLAV_p1315 | Hypothetical protein | 1.25  | 2.22  | 0.20  | 2.97E <sup>-01</sup> | 1.52E <sup>-02</sup> | 9.22E <sup>-01</sup> | 2.37 | 4.65  | 1.15 |
| SCLAV_p1377 | Hypothetical protein | 0.94  | 2.19  | 0.79  | 4.45E <sup>-01</sup> | 9.97E <sup>-03</sup> | 4.86E <sup>-01</sup> | 1.92 | 4.56  | 1.73 |
| SCLAV_p1512 | Hypothetical protein | 0.75  | 2.03  | 0.52  | 6.82E <sup>-01</sup> | 3.36E <sup>-02</sup> | 7.56E <sup>-01</sup> | 1.68 | 4.08  | 1.43 |
| SCLAV_p1514 | Hypothetical protein | 0.27  | 2.31  | 1.05  | 9.15E <sup>-01</sup> | 1.22E <sup>-02</sup> | 3.62E <sup>-01</sup> | 1.21 | 4.95  | 2.06 |
| SCLAV_p1523 | Hypothetical protein | 0.59  | 2.29  | -0.13 | 7.18E <sup>-01</sup> | 7.87E <sup>-03</sup> | 9.49E <sup>-01</sup> | 1.51 | 4.91  | 1.09 |
| SCLAV_p1532 | Hypothetical protein | 0.15  | 2.41  | 0.03  | 9.57E <sup>-01</sup> | 1.04E <sup>-02</sup> | 9.89E <sup>-01</sup> | 1.11 | 5.32  | 1.02 |
| SCLAV_p1559 | Hypothetical protein | 0.41  | 2.46  | 1.01  | 8.70E <sup>-01</sup> | 1.55E <sup>-02</sup> | 4.51E <sup>-01</sup> | 1.32 | 5.49  | 2.01 |

- (1) This hypothetical proteins are not located in secondary metabolites gene clusters.
- (2) The transcription values in *S. clavuligerus* ATCC 27064 are taken as 1.0. Notice that the values shaded in gray corresponds to down-expressed genes at the indicated times.
